# Supplementary material for: First-principles studies on α-Fe2O3 surface slabs and mechanistic elucidation of a g-C3N4/α-Fe2O3 heterojunction
Source: Royal Society of Chemistry journal article supplement (doi:10.1039/c9cy02262g), 2020-01-01
Supplement: c9cy02262g1.pdf [file c9cy02262g1.pdf]

## Supporting information

### First-principles studies on $\alpha$ -Fe<sub>2</sub>O<sub>3</sub> surface slabs and mechanistic elucidation of $g$ -C<sub>3</sub>N<sub>4</sub>/ $\alpha$ -Fe<sub>2</sub>O<sub>3</sub> heterojunctions

Sateesh Bandaru<sup>a,b,c,\*</sup>, Govindarajan Saranya<sup>c</sup>, Wei Wei Liu<sup>a</sup> and Niall J English<sup>b,\*</sup>

<sup>a</sup> College of Materials and Environmental Engineering, Institute for Advanced Magnetic Materials, Hangzhou Dianzi University, Hangzhou 310018, China.

<sup>b</sup> School of Chemical and Bioprocess Engineering, University College Dublin, Belfield, Dublin 4, Ireland.

<sup>c</sup> Beijing Computational Science Research Center, Beijing 100084, China

\*Corresponding authors: Fax +353-17161177, Tel: +353-1-7161646 (NE), E-Mail: Email: [sbandaru@hdu.edu.cn](mailto:sbandaru@hdu.edu.cn), [niall.english@ucd.ie](mailto:niall.english@ucd.ie)

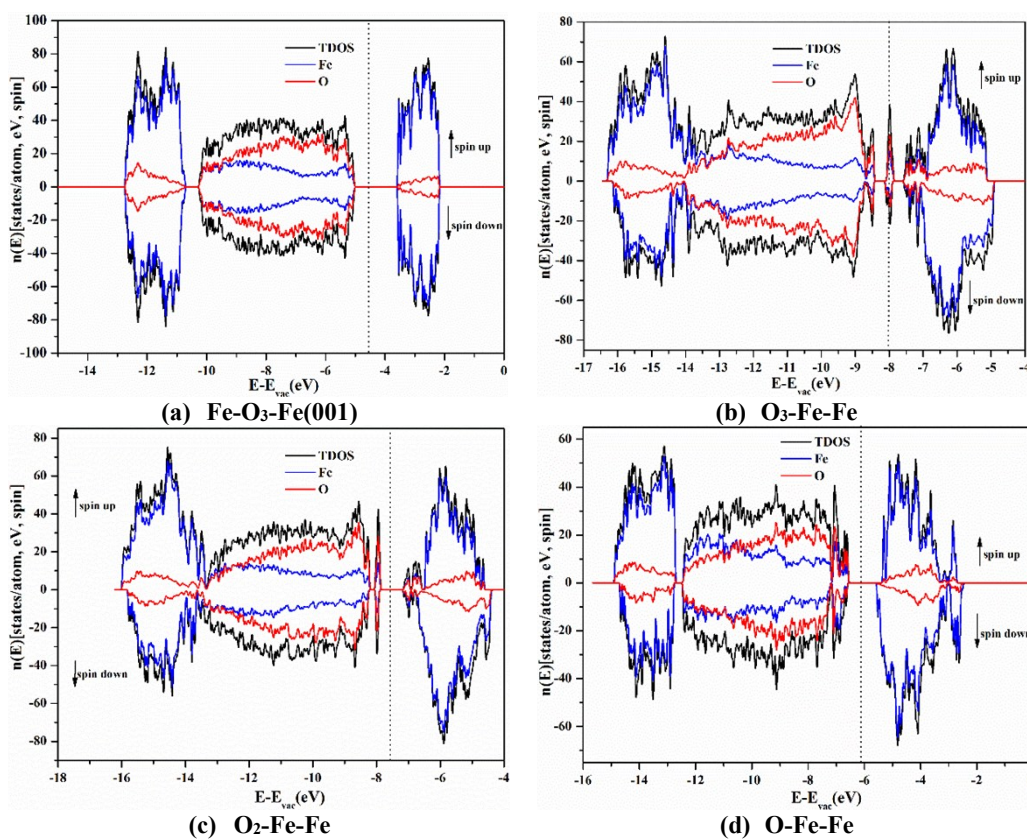

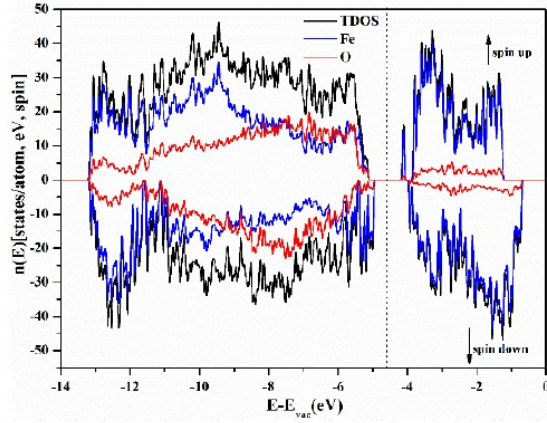

(e) Fe-Fe-O<sub>3</sub>-

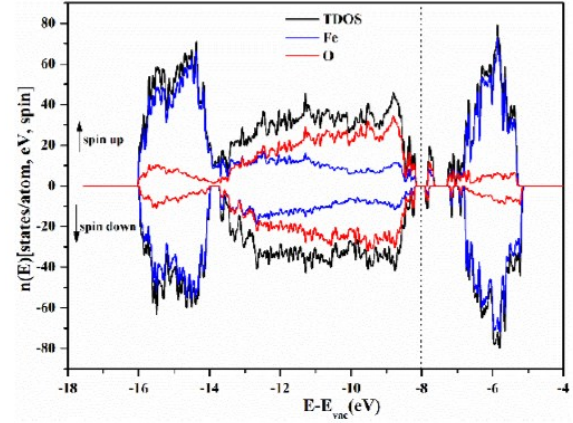

(f) polar-Fe<sub>2</sub>O<sub>3</sub>(001)

**Fig. S1:** Vacuum-aligned TDOS and PDOS of Fe and O in (a) to (f) all these surface slabs considered for the study. (Dotted lines indicates a Fermi level)

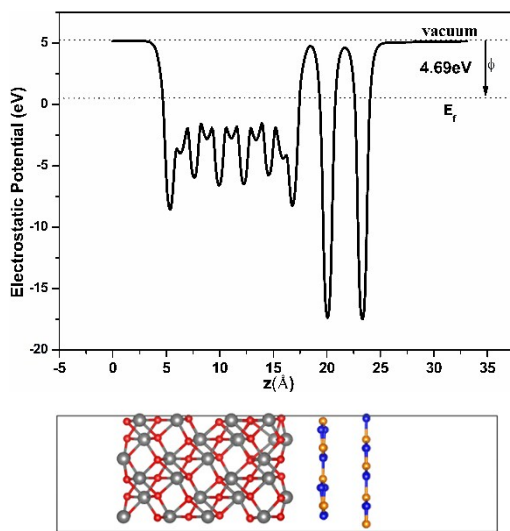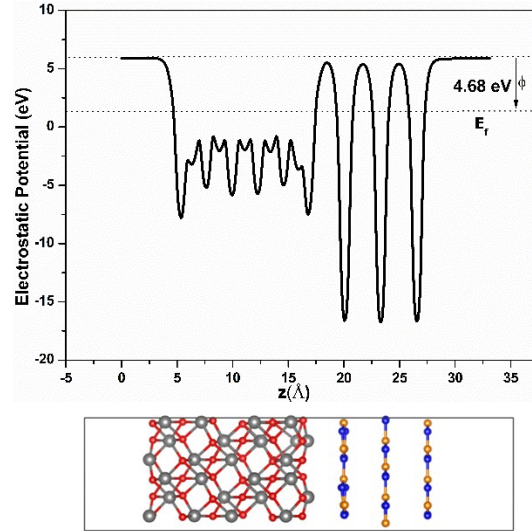

**Fig. S2:** The electrostatic potential for the *bi*-g-C<sub>3</sub>N<sub>4</sub>/Fe<sub>2</sub>O<sub>3</sub> and *tri*-g-C<sub>3</sub>N<sub>4</sub>/Fe<sub>2</sub>O<sub>3</sub> heterostructures; work functions( $\phi$ ) are given in eV.

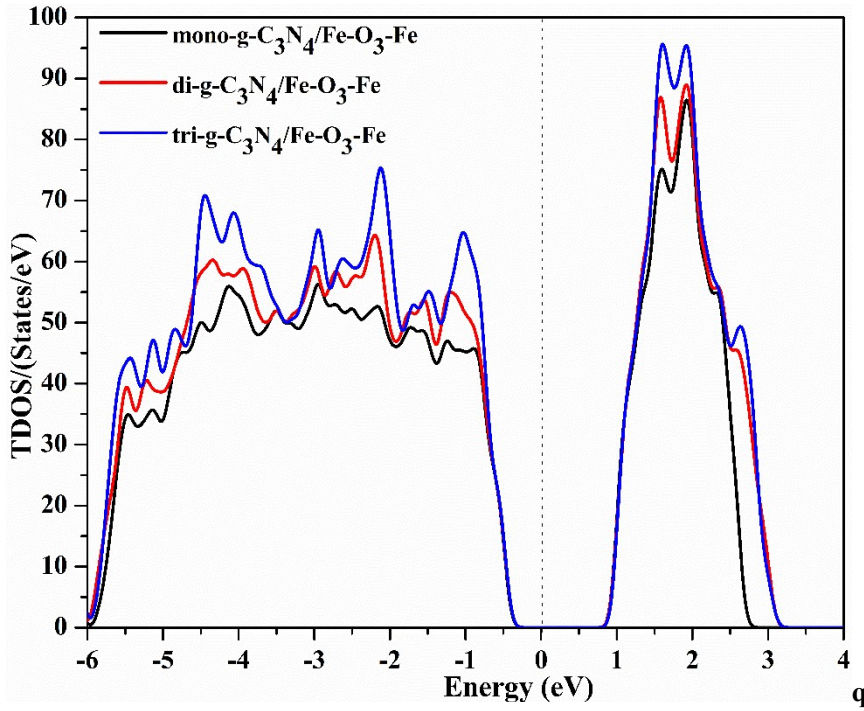

**Fig. S3:** All three heterostructures (*-mono*, *-bi* and *-tri*-g-C<sub>3</sub>N<sub>4</sub>/Fe<sub>2</sub>O<sub>3</sub>) and corresponding Total Density of States, and Fermi level set to zero.

**Table S1:** Bader charges were computed for the individual monomers Fe-O<sub>3</sub>-Fe(001) and g-C<sub>3</sub>N<sub>4</sub>(001) and the corresponding hetero structure g-C<sub>3</sub>N<sub>4</sub>/Fe-O<sub>3</sub>-F, the charge difference also provide after formation of heterojunction. (Atoms numbered based on POSCAR)

| Atom | Monomer  | Hetero Structure | Charge Difference |
|------|----------|------------------|-------------------|
| Fe1  | 1.648965 | 1.729704         | 0.080739          |
| Fe2  | 1.648749 | 1.845014         | 0.196265          |
| Fe3  | 1.75575  | 1.564501         | -0.191249         |
| Fe4  | 1.820875 | 1.57111          | -0.249765         |
| Fe5  | 1.639254 | 1.638005         | -0.001249         |
| Fe6  | 1.513121 | 1.662747         | 0.149626          |
| Fe7  | 1.774883 | 1.644596         | -0.130287         |
| Fe8  | 1.807786 | 1.606367         | -0.201419         |
| Fe9  | 1.617467 | 1.82644          | 0.208973          |
| Fe10 | 1.513731 | 1.773307         | 0.259576          |
| Fe11 | 1.76906  | 1.725422         | -0.043638         |
| Fe12 | 1.774938 | 1.735746         | -0.039192         |
| Fe13 | 1.656169 | 1.729624         | 0.073455          |
| Fe14 | 1.556404 | 1.84516          | 0.288756          |
| Fe15 | 1.766675 | 1.564267         | -0.202408         |
| Fe16 | 1.825867 | 1.570914         | -0.254953         |
| Fe17 | 1.698229 | 1.637259         | -0.06097          |
| Fe18 | 1.46164  | 1.663048         | 0.201408          |

|      |           |           |           |
|------|-----------|-----------|-----------|
| Fe19 | 1.769525  | 1.645005  | -0.12452  |
| Fe20 | 1.757372  | 1.60613   | -0.151242 |
| Fe21 | 1.503127  | 1.826573  | 0.323446  |
| Fe22 | 1.392702  | 1.772992  | 0.38029   |
| Fe23 | 1.950816  | 1.726483  | -0.224333 |
| Fe24 | 1.672693  | 1.735492  | 0.062799  |
| Fe25 | 1.648944  | 1.730052  | 0.081108  |
| Fe26 | 1.532329  | 1.845221  | 0.312892  |
| Fe27 | 1.632546  | 1.564179  | -0.068367 |
| Fe28 | 1.63377   | 1.571223  | -0.062547 |
| Fe29 | 1.754627  | 1.63755   | -0.117077 |
| Fe30 | 1.539621  | 1.662848  | 0.123227  |
| Fe31 | 1.738902  | 1.645374  | -0.093528 |
| Fe32 | 1.811805  | 1.606058  | -0.205747 |
| Fe33 | 1.584887  | 1.826267  | 0.24138   |
| Fe34 | 1.268532  | 1.772183  | 0.503651  |
| Fe35 | 1.434557  | 1.725394  | 0.290837  |
| Fe36 | 1.680687  | 1.736063  | 0.055376  |
| Fe37 | 1.654838  | 1.730287  | 0.075449  |
| Fe38 | 1.57447   | 1.845006  | 0.270536  |
| Fe39 | 1.700402  | 1.564026  | -0.136376 |
| Fe40 | 1.594216  | 1.571275  | -0.022941 |
| Fe41 | 1.570667  | 1.637985  | 0.067318  |
| Fe42 | 1.359983  | 1.662124  | 0.302141  |
| Fe43 | 1.733814  | 1.64495   | -0.088864 |
| Fe44 | 1.789313  | 1.606155  | -0.183158 |
| Fe45 | 1.587845  | 1.826573  | 0.238728  |
| Fe46 | 1.434307  | 1.773311  | 0.339004  |
| Fe47 | 1.76473   | 1.725849  | -0.038881 |
| Fe48 | 0.867043  | 1.735759  | 0.868716  |
| O1   | -1.130385 | -1.062481 | 0.067904  |
| O2   | -1.064953 | -1.193469 | -0.128516 |
| O3   | -0.816725 | -1.091822 | -0.275097 |
| O4   | -1.205796 | -1.135041 | 0.070755  |
| O5   | -1.098538 | -1.021051 | 0.077487  |
| O6   | -1.125737 | -1.186443 | -0.060706 |
| O7   | -1.20786  | -1.188485 | 0.019375  |
| O8   | -1.090957 | -1.075855 | 0.015102  |
| O9   | -1.129431 | -1.126412 | 0.003019  |
| O10  | -1.084201 | -1.132854 | -0.048653 |
| O11  | -1.12426  | -1.119014 | 0.005246  |
| O12  | -0.974422 | -1.154721 | -0.180299 |
| O13  | -1.227662 | -1.123819 | 0.103843  |

|     |           |           |           |
|-----|-----------|-----------|-----------|
| O14 | -1.066643 | -1.092197 | -0.025554 |
| O15 | -1.067261 | -1.129058 | -0.061797 |
| O16 | -1.12349  | -1.115748 | 0.007742  |
| O17 | -1.150472 | -1.174058 | -0.023586 |
| O18 | -1.015168 | -1.148158 | -0.13299  |
| O19 | -1.112367 | -1.062357 | 0.05001   |
| O20 | -1.080855 | -1.193775 | -0.11292  |
| O21 | -0.966529 | -1.092295 | -0.125766 |
| O22 | -1.122057 | -1.134371 | -0.012314 |
| O23 | -1.082272 | -1.021164 | 0.061108  |
| O24 | -1.101086 | -1.186421 | -0.085335 |
| O25 | -1.20531  | -1.188195 | 0.017115  |
| O26 | -1.027002 | -1.075807 | -0.048805 |
| O27 | -0.975194 | -1.126428 | -0.151234 |
| O28 | -1.150675 | -1.132133 | 0.018542  |
| O29 | -1.120443 | -1.118759 | 0.001684  |
| O30 | -0.95121  | -1.154241 | -0.203031 |
| O31 | -1.184224 | -1.123599 | 0.060625  |
| O32 | -1.162933 | -1.092392 | 0.070541  |
| O33 | -1.229813 | -1.129132 | 0.100681  |
| O34 | -1.129858 | -1.116101 | 0.013757  |
| O35 | -1.152197 | -1.173269 | -0.021072 |
| O36 | -0.957131 | -1.148157 | -0.191026 |
| O37 | -1.11612  | -1.062477 | 0.053643  |
| O38 | -1.011904 | -1.192122 | -0.180218 |
| O39 | -0.923698 | -1.091663 | -0.167965 |
| O40 | -1.087889 | -1.134377 | -0.046488 |
| O41 | -1.104901 | -1.021662 | 0.083239  |
| O42 | -1.06391  | -1.186072 | -0.122162 |
| O43 | -1.168093 | -1.187951 | -0.019858 |
| O44 | -1.10676  | -1.075906 | 0.030854  |
| O45 | -0.997754 | -1.12638  | -0.128626 |
| O46 | -1.097139 | -1.131084 | -0.033945 |
| O47 | -1.125062 | -1.118751 | 0.006311  |
| O48 | -0.927507 | -1.153918 | -0.226411 |
| O49 | -1.241591 | -1.124145 | 0.117446  |
| O50 | -1.152806 | -1.092952 | 0.059854  |
| O51 | -1.01228  | -1.128568 | -0.116288 |
| O52 | -1.076245 | -1.115865 | -0.03962  |
| O53 | -1.156553 | -1.173917 | -0.017364 |
| O54 | -0.948159 | -1.147667 | -0.199508 |
| O55 | -1.091908 | -1.062279 | 0.029629  |
| O56 | -0.996849 | -1.193818 | -0.196969 |

|     |           |           |           |
|-----|-----------|-----------|-----------|
| O57 | -1.065564 | -1.09213  | -0.026566 |
| O58 | -0.958028 | -1.135122 | -0.177094 |
| O59 | -1.108932 | -1.021644 | 0.087288  |
| O60 | -1.042969 | -1.186412 | -0.143443 |
| O61 | -1.15952  | -1.188423 | -0.028903 |
| O62 | -1.092559 | -1.075893 | 0.016666  |
| O63 | -0.930527 | -1.1263   | -0.195773 |
| O64 | -1.134019 | -1.13167  | 0.002349  |
| O65 | -1.129315 | -1.118711 | 0.010604  |
| O66 | -0.947658 | -1.153925 | -0.206267 |
| O67 | -1.189975 | -1.124227 | 0.065748  |
| O68 | -1.065354 | -1.093107 | -0.027753 |
| O69 | -1.034645 | -1.129078 | -0.094433 |
| O70 | -1.19782  | -1.115945 | 0.081875  |
| O71 | -1.161857 | -1.174094 | -0.012237 |
| O72 | -1.012689 | -1.148063 | -0.135374 |
| N1  | -0.752446 | -0.198962 | 0.553484  |
| N2  | -0.608905 | -0.220368 | 0.388537  |
| N3  | -0.673374 | -0.221498 | 0.451876  |
| N4  | -0.58232  | -0.181627 | 0.400693  |
| N5  | -0.631829 | -0.198962 | 0.432867  |
| N6  | -0.538571 | -0.220368 | 0.318203  |
| N7  | -0.76247  | -0.221498 | 0.540972  |
| N8  | -0.543317 | -0.181627 | 0.36169   |
| N9  | -0.73644  | -0.198962 | 0.537478  |
| N10 | -0.590026 | -0.220368 | 0.369658  |
| N11 | -0.579546 | -0.221498 | 0.358048  |
| N12 | -0.509514 | -0.181627 | 0.327887  |
| N13 | -0.678501 | -0.198962 | 0.479539  |
| N14 | -0.620856 | -0.220368 | 0.400488  |
| N15 | -0.598145 | -0.221498 | 0.376647  |
| N16 | -0.518876 | -0.181627 | 0.337249  |
| C1  | 0.833251  | 0.272573  | -0.560678 |
| C2  | 0.868701  | 0.274941  | -0.59376  |
| C3  | 0.84434   | 0.274941  | -0.569399 |
| C4  | 0.817741  | 0.272573  | -0.545168 |
| C5  | 0.863233  | 0.274941  | -0.588292 |
| C6  | 1.007075  | 0.274941  | -0.732134 |
| C7  | 0.771422  | 0.272573  | -0.498849 |
| C8  | 0.775706  | 0.274941  | -0.500765 |
| C9  | 0.81264   | 0.274941  | -0.537699 |
| C10 | 0.772749  | 0.272573  | -0.500176 |
| C11 | 0.802254  | 0.274941  | -0.527313 |

|     |          |          |           |
|-----|----------|----------|-----------|
| C12 | 0.927574 | 0.274941 | -0.652633 |
|-----|----------|----------|-----------|
